# Supplementary material
Source: Springer Nature journal article supplement (https://www.springermedizin.de/resource/supplementary/12943_2009_564_MOESM4_ESM.pdf/9554986)

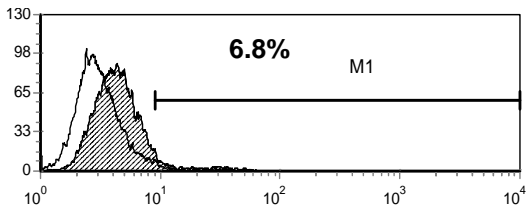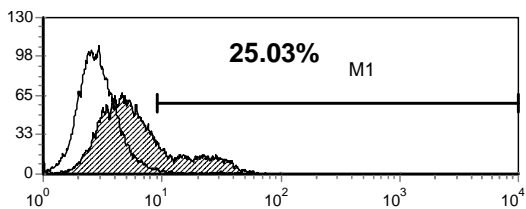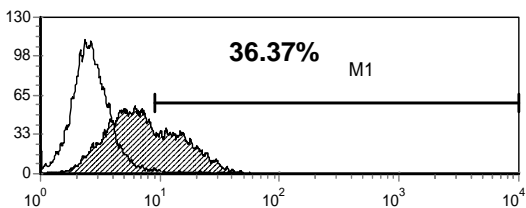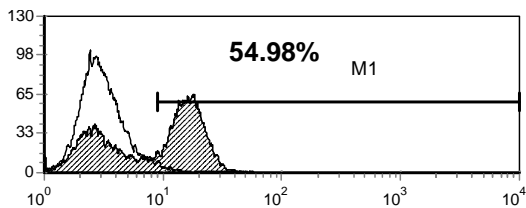

 SAHA 3  $\mu$ M  
 untreated

Supplement: MOESM4 [file 9554986]
